# Supplementary material
Source: PubMed Central journal article supplement (PMC3225270)

**NC**

**SiCON**

**M-**

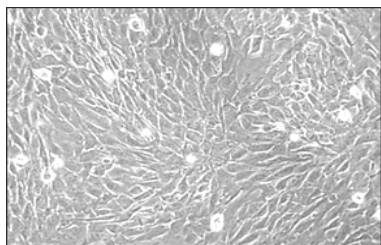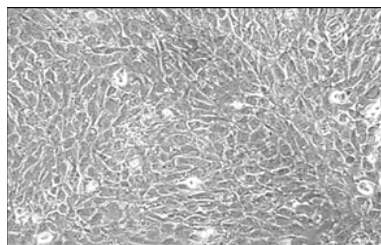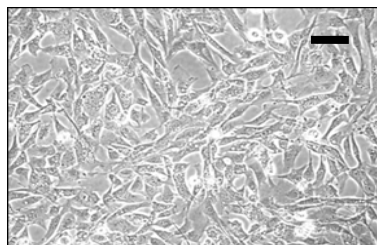

**SS-0h**

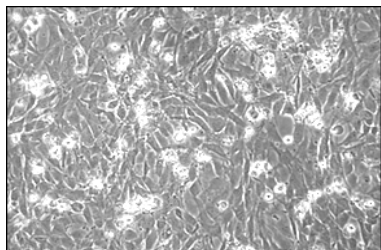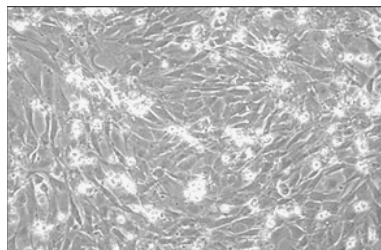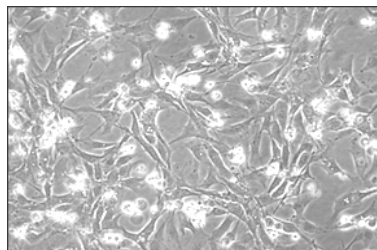

**SS-6h**

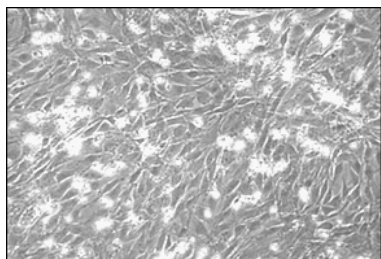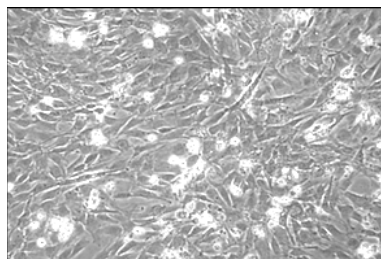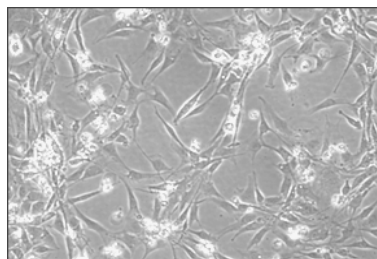

**SS-12h**

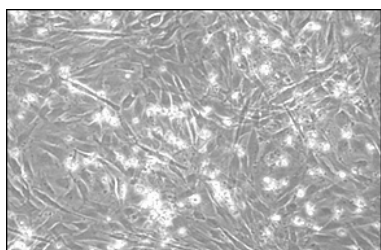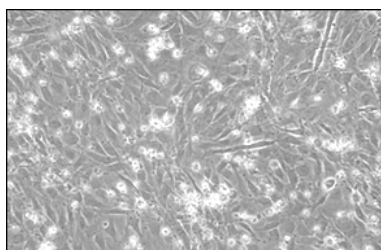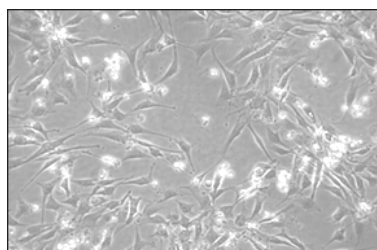

**SS-24h**

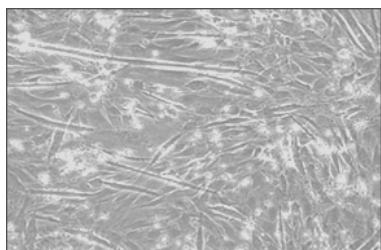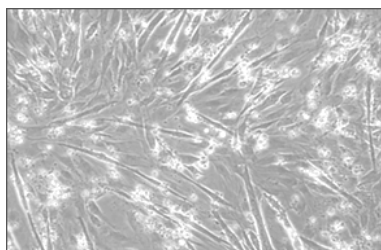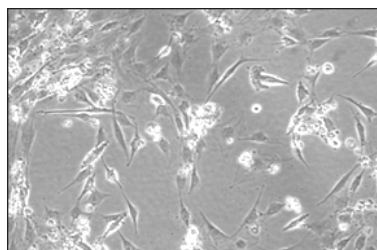

**SS-48h**

Supplement: supp_jcs.086686_JCS086686FigS1.pdf [file supp_jcs.086686_JCS086686FigS1.pdf]

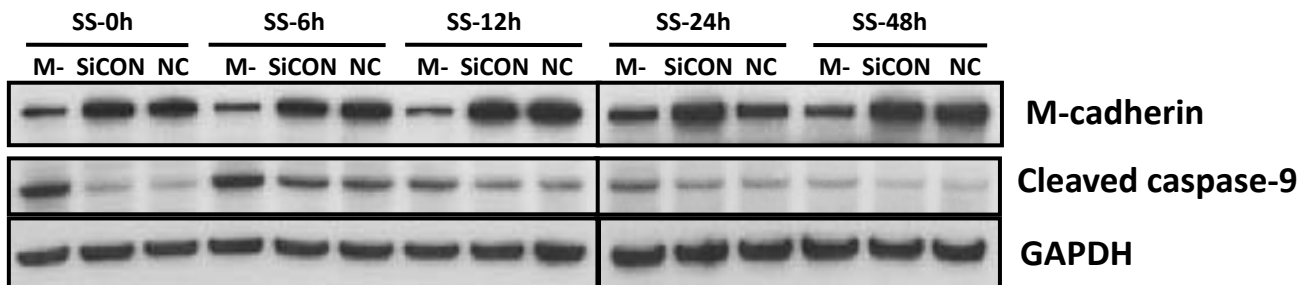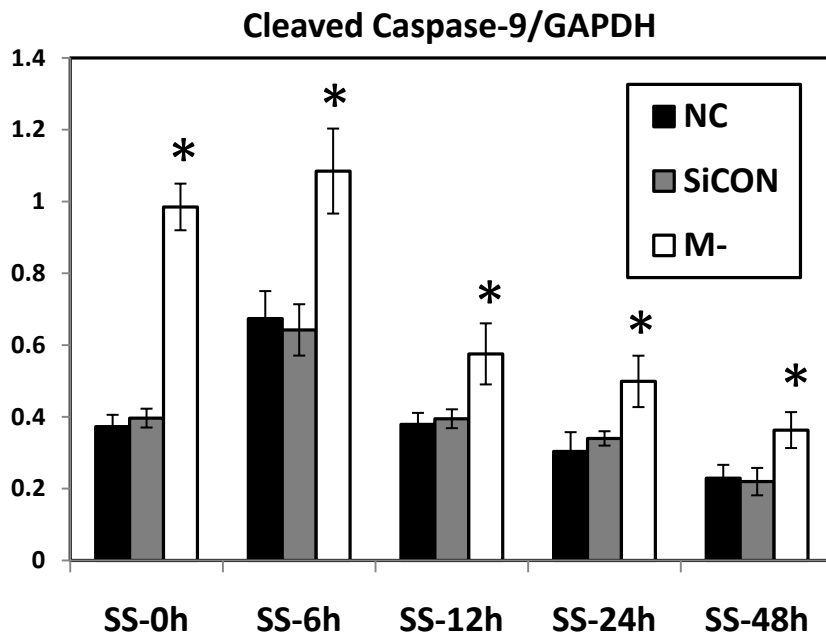

Supplement: supp_jcs.086686_JCS086686FigS2.pdf [file supp_jcs.086686_JCS086686FigS2.pdf]

**A****GFP+**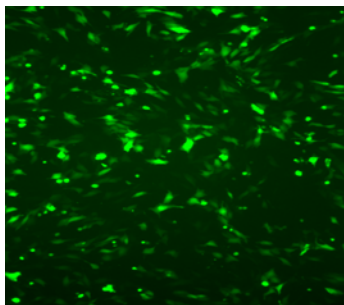**Phase-contrast**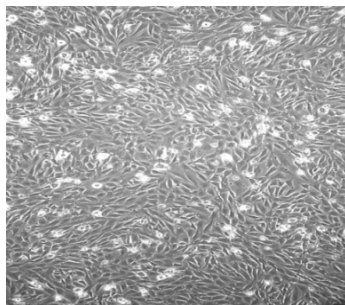**Merged**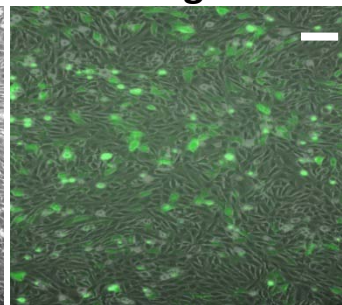**B****GFP+**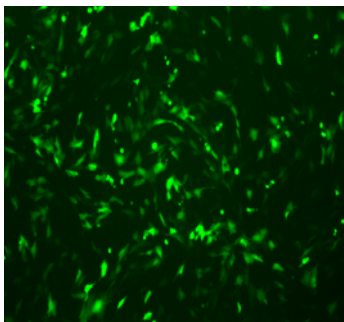**Phase-contrast**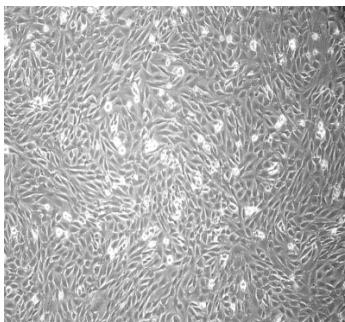**Merged**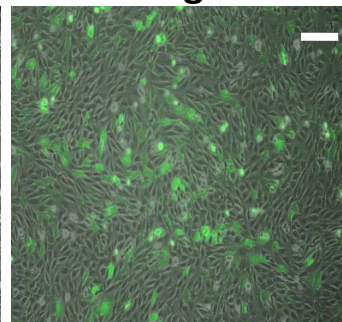

Supplement: supp_jcs.086686_JCS086686FigS3.pdf [file supp_jcs.086686_JCS086686FigS3.pdf]

**A**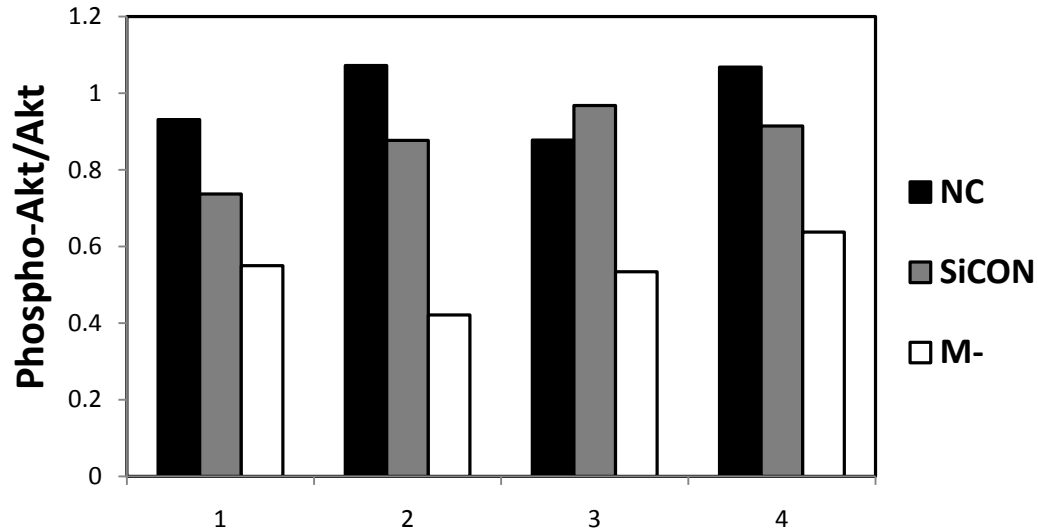**B**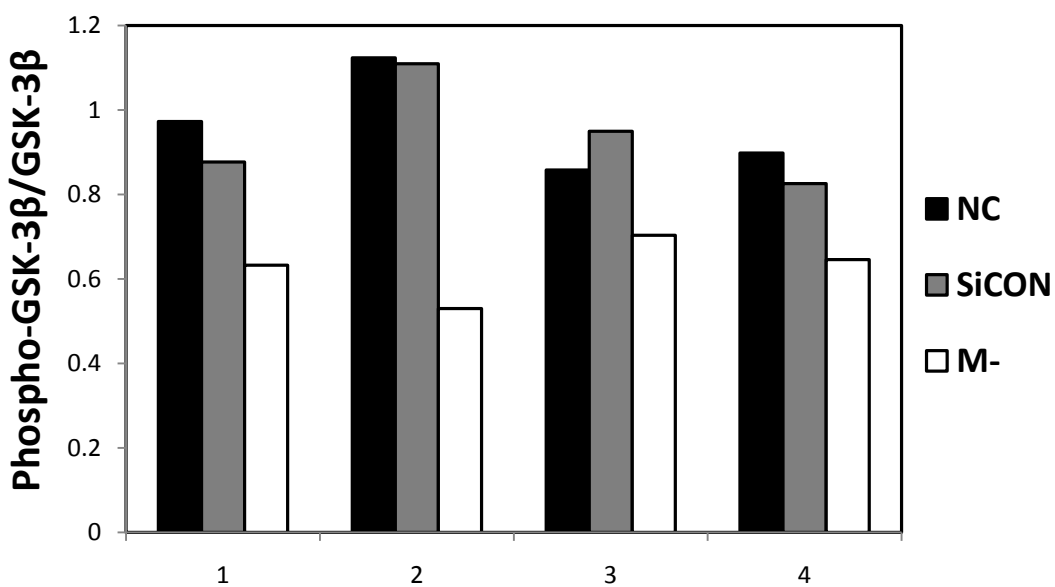

**C**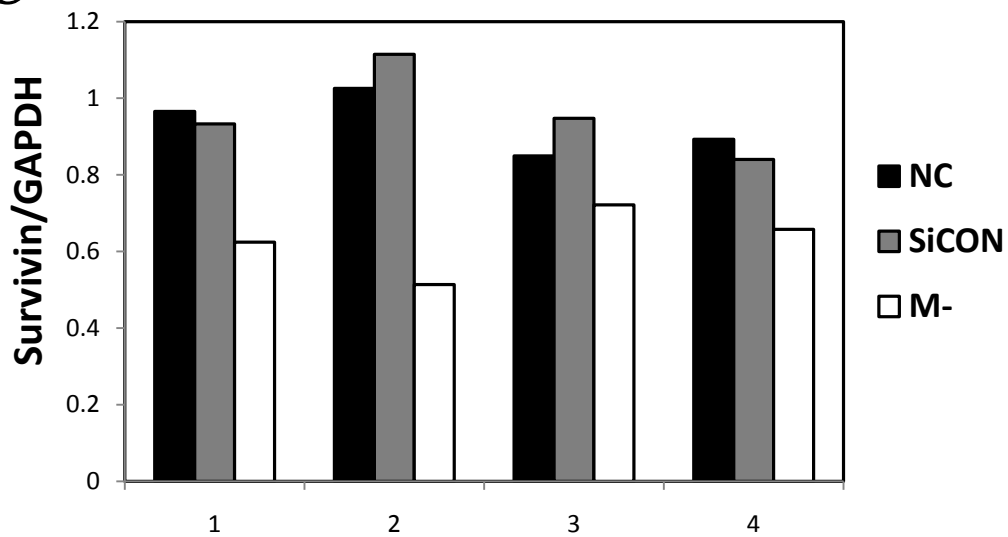**D**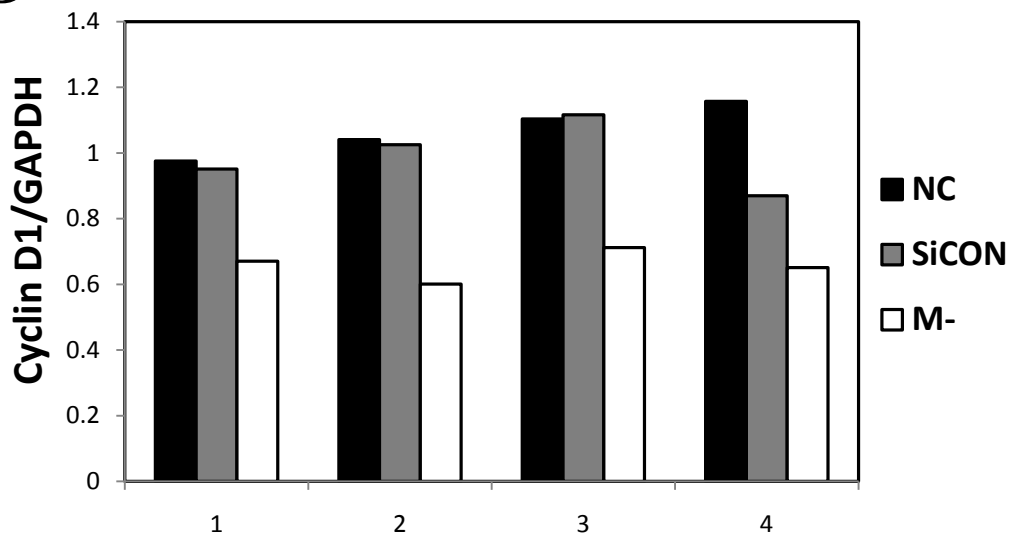

Supplement: supp_jcs.086686_JCS086686FigS4.pdf [file supp_jcs.086686_JCS086686FigS4.pdf]

**A**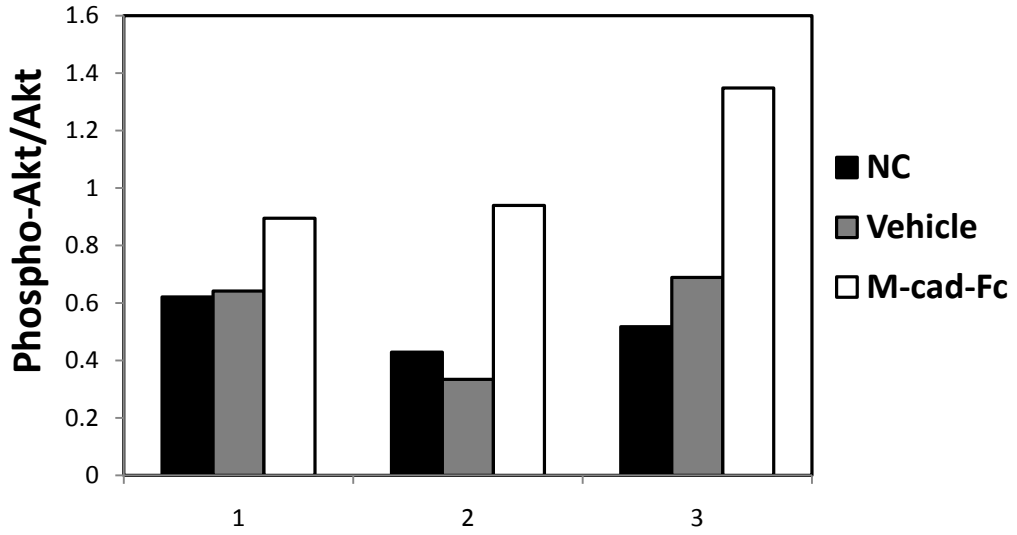**B**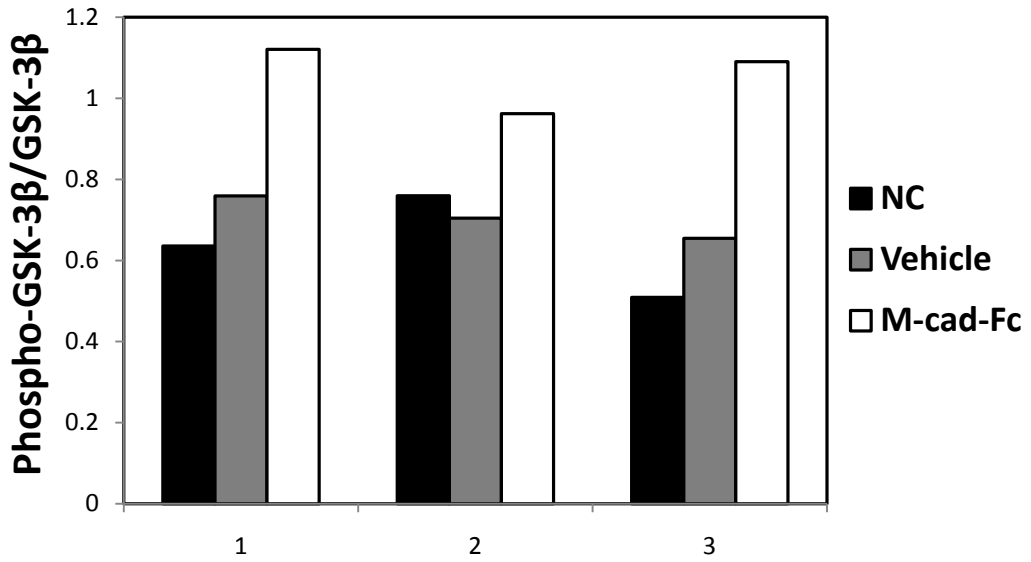

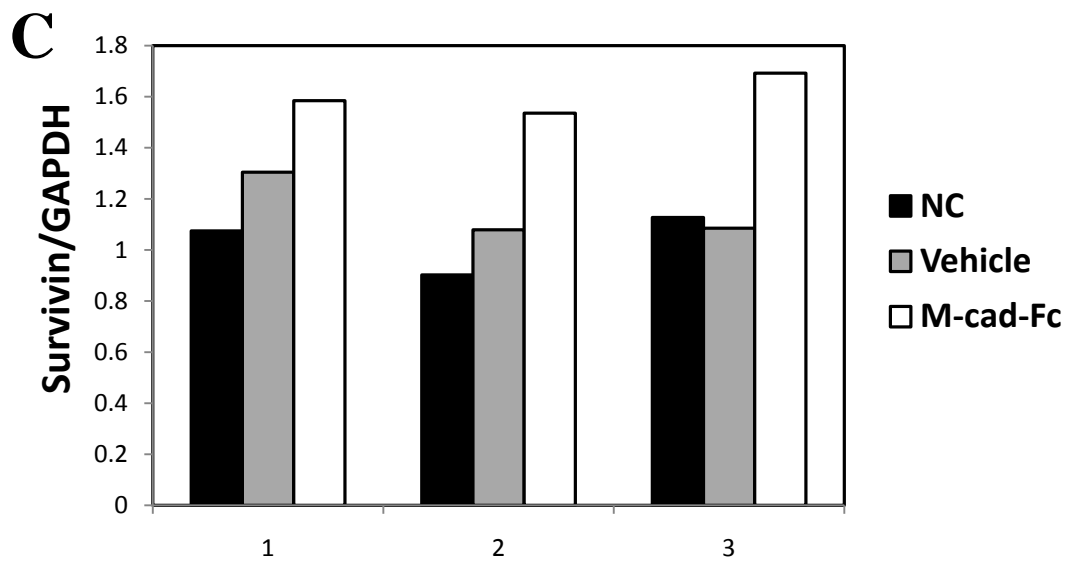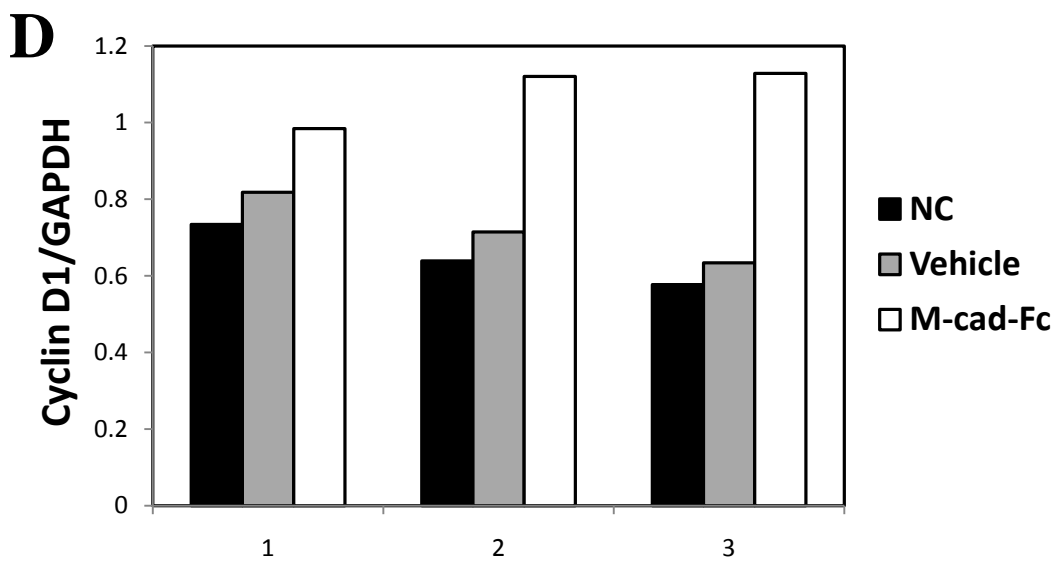

Supplement: supp_jcs.086686_JCS086686FigS5.pdf [file supp_jcs.086686_JCS086686FigS5.pdf]
